# Supplementary material for: The Immune Effects of an African Traditional Energy Tonic in In Vitro and In Vivo Models
Source: Hindawi journal article supplement (doi:10.1155/2017/6310967), 2017-01-01
Supplement: f1 [file 6310967.f1.pdf]

**Additional data:**  
**Preliminary profiling of the Traditional energy tonic**

**1. Gas Chromatography-Mass Spectrometry**

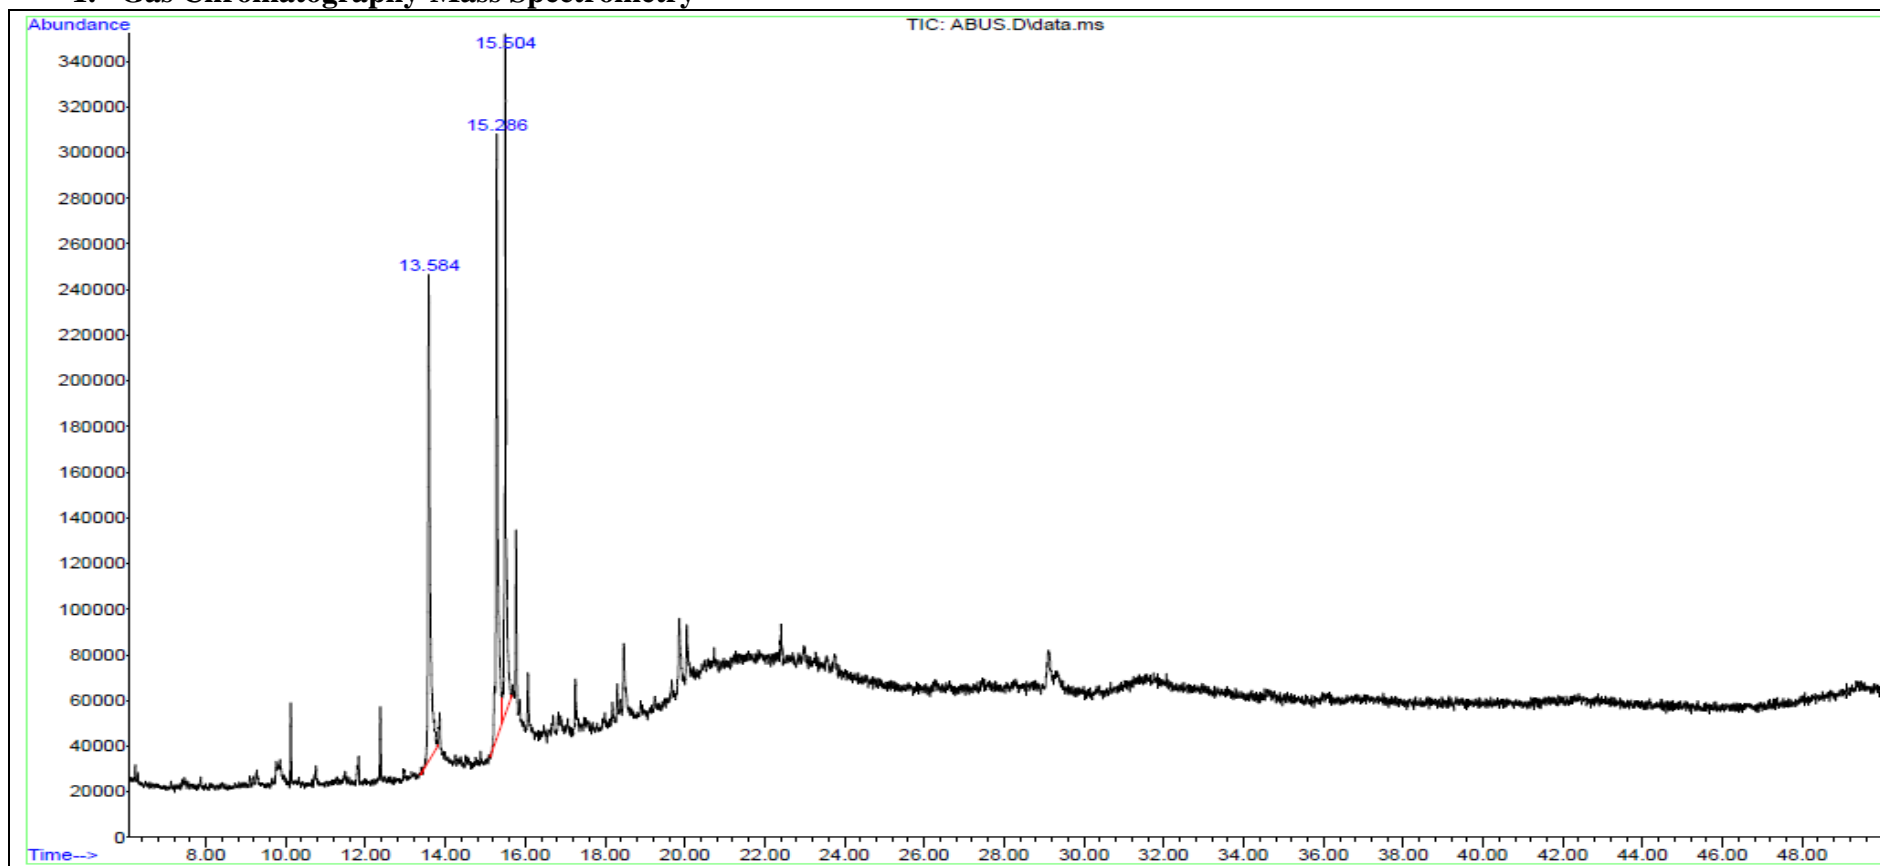

FIGURE 1: GC-MS spectrum of the 50% acetonitrile in deionised water extract of the traditional energy tonic. Some of the prominent actives isolated include Benzophenone (10.13 min), Phenol, 2,2'-methylenebis- (11.824 min), Phthalic acid, decyl methyl ester (12.382 min), n-Hexadecanoic acid (13.584 min), Octadecanoic acid (15.559 min), Oleic acid (15.303 min), 1,4-Benzenedicarboxylic acid, bis(2-hydroxyethyl) ester (15.777 min), etc.

## 2. Nuclear magnetic resonance

### 2.1 Water extract

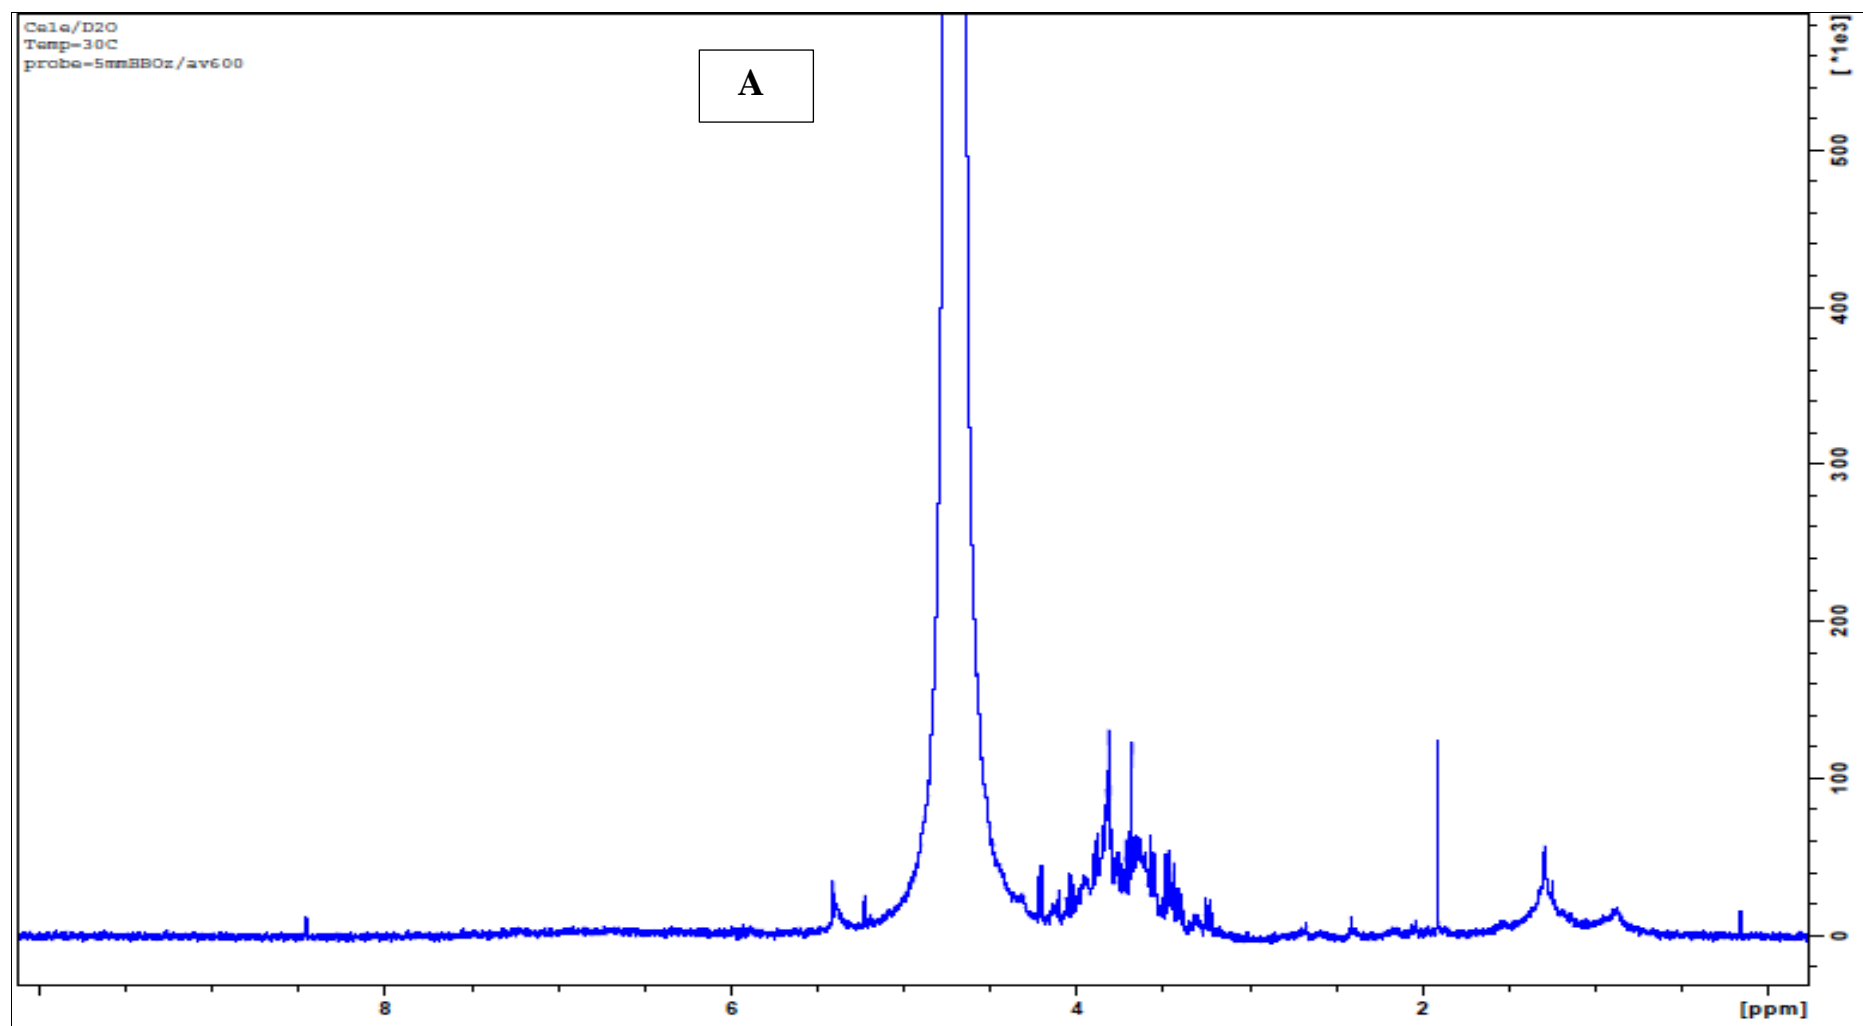

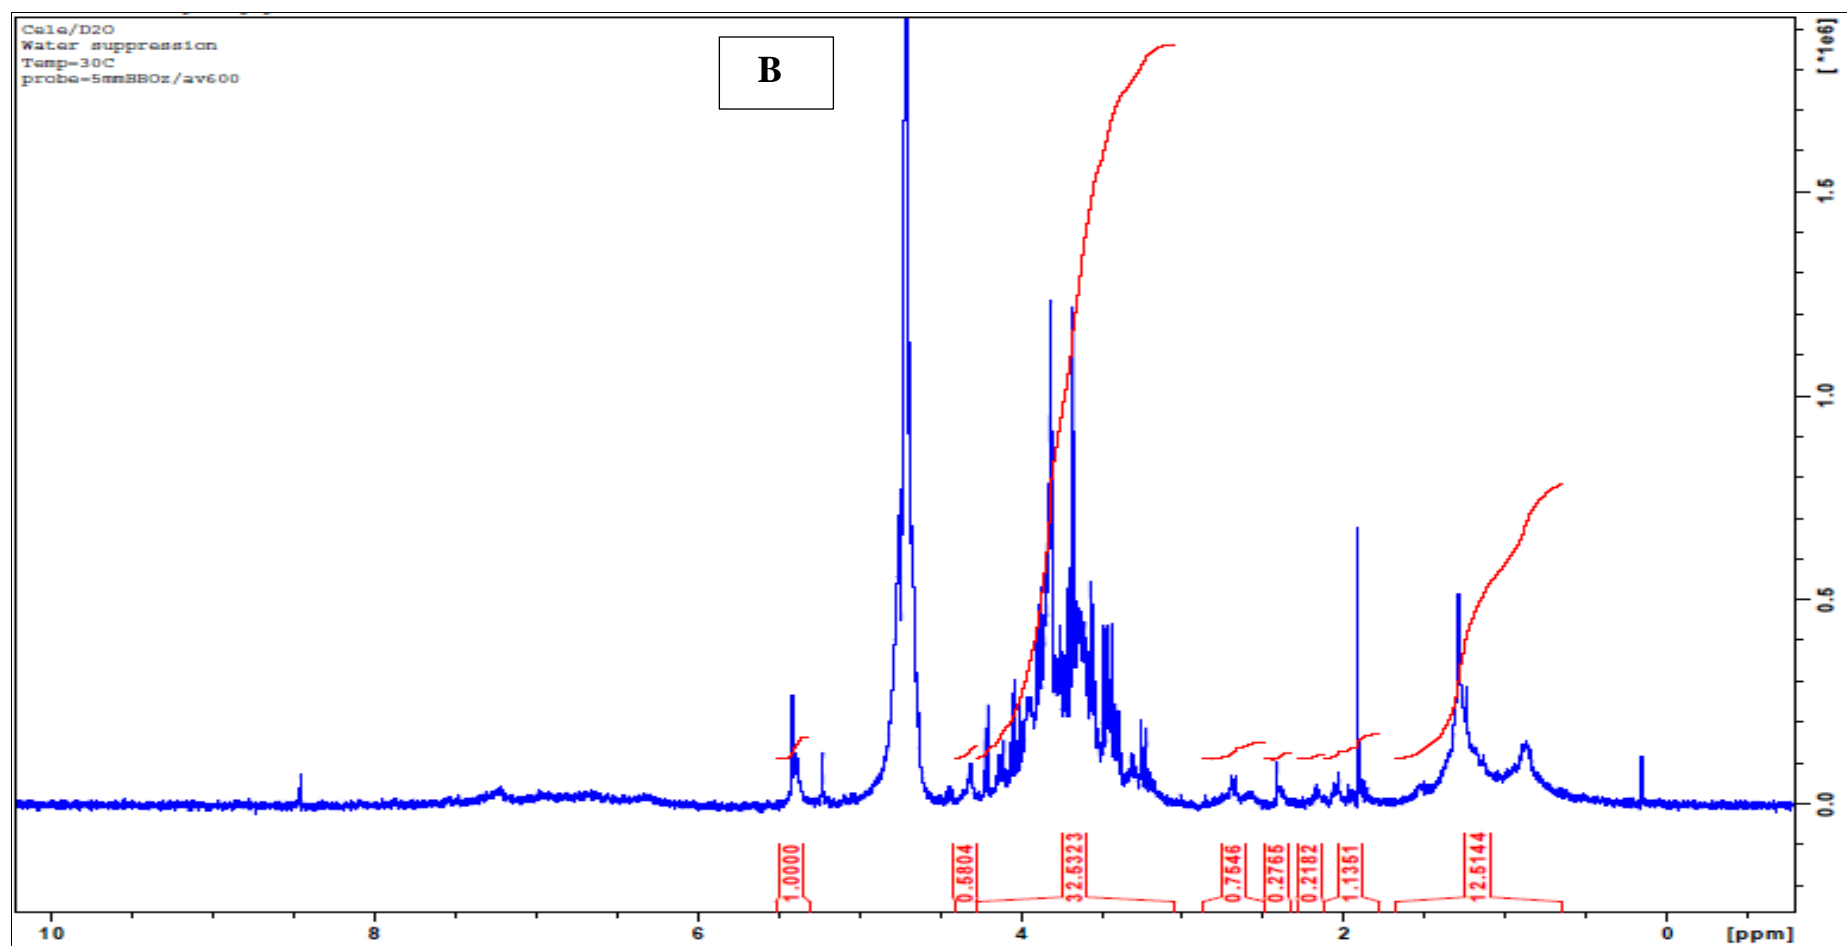

FIGURE 2: Nuclear magnetic resonance spectra of water extracts of the traditional energy tonic. The top spectrum (A) is of a complete water extract analysed at 30 degrees and bottom one (B) is similar but with water suppressed to enhance the spectrum. Both these spectra showed that the traditional energy tonic extracts have mostly water soluble (1-6 ppm) compounds and a minority water insoluble compounds (7-10 ppm) which account for the observed effects in this study. The  $C^{13}$  analyses of the extracts did not produce an analysable spectra.

**Peritoneal lavage blood smear count**

TABLE 1: Blood smear count from Sprague Dawley rats pre-treated with energy tonic doses followed by infection with *S. aureus* 24 hours later.

| PRE INFECTION |       |              |                  |                 |                 |                           |                 |
|---------------|-------|--------------|------------------|-----------------|-----------------|---------------------------|-----------------|
| Rat nr.       | Group | Drug         | Challenge        | Lymphocytes (%) | Macrophages (%) | Segmented neutrophils (%) | Eosinophils (%) |
| 1             | GP 1  | no treatment |                  | 7               | 74              | 0                         | 13              |
| 2             | GP 1  | no treatment |                  | 12              | 68              | 1                         | 12              |
| 3             | GP 1  | no treatment |                  | 7               | 68              | 0                         | 18              |
| 4             | GP 1  | no treatment |                  | 4               | 66              | 0                         | 21              |
| 5             | GP 1  | no treatment |                  | 3               | 61              | 0                         | 26              |
|               |       |              |                  |                 |                 |                           |                 |
| 41            | GP 2  | Saline       | Saline           | 5               | 67              | 0                         | 22              |
| 33            | GP 2  | Saline       | Saline           | 13              | 69              | 1                         | 14              |
| 52            | GP 2  | Saline       | Saline           | 13              | 72              | 0                         | 12              |
| 31            | GP 2  | Saline       | Saline           | 14              | 57              | 0                         | 25              |
| 40            | GP 2  | Saline       | Saline           | 2               | 76              | 1                         | 13              |
|               |       |              |                  |                 |                 |                           |                 |
| 65            | GP 3  | Saline       | Staph aureus 107 | 10              | 67              | 1                         | 18              |
| 68            | GP3   | Saline       | Staph aureus 107 | 14              | 75              | 8                         | 3               |
| 66            | GP 3  | Saline       | Staph aureus 107 | 5               | 58              | 19                        | 15              |
| 20            | GP 3  | Saline       | Staph aureus 107 | 3               | 65              | 8                         | 17              |
| 34            | GP 3  | Saline       | Staph aureus 107 | 9               | 80              | 6                         | 3               |
|               |       |              |                  |                 |                 |                           |                 |
| 53            | GP 4  | TM 100 mg/kg | Staph aureus 107 | 11              | 78              | 8                         | 2               |
| 23            | GP 4  | TM 100 mg/kg | Staph aureus 107 | 8               | 67              | 10                        | 13              |
| 45            | GP 4  | TM 100 mg/kg | Staph aureus 107 | 5               | 67              | 14                        | 13              |
| 62            | GP 4  | TM 100 mg/kg | Staph aureus 107 | 7               | 70              | 13                        | 8               |
| 58            | GP 4  | TM 100 mg/kg | Staph aureus 107 | 8               | 55              | 10                        | 23              |
|               |       |              |                  |                 |                 |                           |                 |

|    |      |             |                  |   |    |    |    |
|----|------|-------------|------------------|---|----|----|----|
| 56 | GP 5 | TM 20 mg/kg | Staph aureus 107 | 2 | 68 | 2  | 18 |
| 46 | GP 5 | TM 20 mg/kg | Staph aureus 107 | 3 | 65 | 8  | 14 |
| 25 | GP 5 | TM 20 mg/kg | Staph aureus 107 | 6 | 83 | 6  | 3  |
| 69 | GP 5 | TM 20 mg/kg | Staph aureus 107 | 3 | 75 | 12 | 9  |
| 32 | GP 5 | TM 20 mg/kg | Staph aureus 107 | 7 | 86 | 5  | 1  |
|    |      |             |                  |   |    |    |    |
| 27 | GP 6 | 5% Baytril  | Staph aureus 107 | 5 | 84 | 6  | 3  |
| 47 | GP 6 | 5% Baytril  | Staph aureus 107 | 5 | 64 | 7  | 17 |
| 67 | GP 6 | 5% Baytril  | Staph aureus 107 | 5 | 93 | 2  | 0  |
| 49 | GP 6 | 5% Baytril  | Staph aureus 107 | 1 | 74 | 4  | 15 |
| 59 | GP 6 | 5% Baytril  | Staph aureus 107 | 0 | 82 | 7  | 10 |

TABLE 2: Blood smear count from Sprague Dawley rats infected with *S. aureus* followed by treatment with energy tonic doses 24 hours later.

| POST INFECTION |       |                  |              |                 |                 |                           |                 |
|----------------|-------|------------------|--------------|-----------------|-----------------|---------------------------|-----------------|
| Rat nr.        | Group | Challenge        | Drug         | Lymphocytes (%) | Macrophages (%) | Segmented neutrophils (%) | Eosinophils (%) |
| 35             | GP 7  | Staph aureus 107 | Saline       | 4               | 49              | 37                        | 9               |
| 42             | GP7   | Staph aureus 107 | Saline       | 3               | 78              | 9                         | 9               |
| 51             | GP 7  | Staph aureus 107 | Saline       | 12              | 74              | 4                         | 7               |
| 29             | GP 7  | Staph aureus 107 | Saline       | 13              | 70              | 10                        | 5               |
| 26             | GP 7  | Staph aureus 107 | Saline       | 6               | 78              | 2                         | 14              |
|                |       |                  |              |                 |                 |                           |                 |
| 30             | GP 8  | Staph aureus 107 | TM 100 mg/kg | 7               | 80              | 7                         | 1               |
| 24             | GP 8  | Staph aureus 107 | TM 100 mg/kg | 46              | 19              | 24                        | 11              |
| 60             | GP 8  | Staph aureus 107 | TM 100 mg/kg | 12              | 66              | 8                         | 14              |
| 54             | GP 8  | Staph aureus 107 | TM 100 mg/kg | 20              | 58              | 3                         | 17              |
| 63             | GP 8  | Staph aureus 107 | TM 100 mg/kg | 6               | 81              | 6                         | 6               |
|                |       |                  |              |                 |                 |                           |                 |
| 21             | GP 9  | Staph aureus 107 | TM 20 mg/kg  | 5               | 58              | 27                        | 9               |
| 50             | GP 9  | Staph aureus 107 | TM 20 mg/kg  | 10              | 79              | 3                         | 3               |
| 22             | GP 9  | Staph aureus 107 | TM 20 mg/kg  | 10              | 76              | 0                         | 13              |
| 61             | GP 9  | Staph aureus 107 | TM 20 mg/kg  | 6               | 75              | 8                         | 8               |
| 55             | GP 9  | Staph aureus 107 | TM 20 mg/kg  | 8               | 61              | 8                         | 22              |
|                |       |                  |              |                 |                 |                           |                 |
| 64             | GP 10 | Staph aureus 107 | 5% Baytril   | 11              | 79              | 1                         | 9               |
| 57             | GP 10 | Staph aureus 107 | 5% Baytril   | 3               | 78              | 14                        | 4               |
| 39             | GP 10 | Staph aureus 107 | 5% Baytril   | 3               | 89              | 5                         | 2               |
| 38             | GP 10 | Staph aureus 107 | 5% Baytril   | 4               | 72              | 15                        | 7               |
| 37             | GP 10 | Staph aureus 107 | 5% Baytril   | 1               | 83              | 6                         | 9               |
